# Supplementary material
Source: PubMed Central journal article supplement (PMC3079009)

### **Supplemental methods**

**Cell culture and drug treatment.** HT-29 colon cancer cells were obtained from ATCC and maintained at 37°C in 5% CO<sub>2</sub> in McCoy's 5A medium (Invitrogen, Carlsbad, CA) supplemented with 10% FBS (HyClone, Logan, UT), 100 units/ml penicillin and 100 µg/ml streptomycin (Invitrogen) as described (1, 2). The cells were exposed to 150 nM Smac mimetic GT-A, and the control compound, GT-C (3) with or without human TNF- $\alpha$  neutralizing antibody (R&D system, Minneapolis, MN, USA) (5µg/ml) for 48 h. Cells were analyzed for apoptosis using nuclear fragmentation assay.

**Reverse transcriptase PCR (RT-PCR) and real-time PCR analysis.** Total RNA was isolated from HNSCC cells using the RNeasy Total RNA Isolation System (Promega, Madison, WI, USA). First-strand cDNA was synthesized from 5 µg of total RNA using Superscript II reverse transcriptase (Invitrogen). The primers used for cIAP1 are 5-TGTCAGCACTTCTTAATGCTG-3 and 5-CAGTTCTCTCGCTTGTAAGG-3, for cIAP2 are 5-AGCCAGTTACCCTCATCTAC-3 and CTACTAAAGCCCATTTCCAC-3, and for GAPDH are 5-CTCAGACACCATGGGGAAGGTGA-3 and 5-ATGATCTTGAGGCTGTTGTCATA-3. The detailed conditions for real-time PCR are available on request (4-6).

### **Supplemental references**

1. Yu J, Zhang L, Hwang PM, Rago C, Kinzler KW, Vogelstein B. Identification and classification of p53-regulated genes. Proc Natl Acad Sci U S A 1999;96: 14517-22.

2. Kohli M, Yu J, Seaman C, *et al.* SMAC/Diablo-dependent apoptosis induced by nonsteroidal antiinflammatory drugs (NSAIDs) in colon cancer cells. *Proc Natl Acad Sci U S A* 2004;101: 16897-902.
3. Bank A, Wang P, Du C, Yu J, Zhang L. SMAC mimetics sensitize nonsteroidal anti-inflammatory drug-induced apoptosis by promoting caspase-3-mediated cytochrome c release. *Cancer Res* 2008;68: 276-84.
4. Sun Q, Ming L, Thomas SM, *et al.* PUMA mediates EGFR tyrosine kinase inhibitor-induced apoptosis in head and neck cancer cells. *Oncogene* 2009;18: 2348-57.
5. Wu B, Qiu W, Wang P, *et al.* p53 independent induction of PUMA mediates intestinal apoptosis in response to ischaemia-reperfusion. *Gut* 2007;56: 645-54.
6. Qiu W, Carson-Walter EB, Liu H, *et al.* PUMA regulates intestinal progenitor cell radiosensitivity and gastrointestinal syndrome. *Cell Stem Cell* 2008;2: 576-83.

### **Supplemental figure legends**

#### **Figure S1. Smac mediates apoptosis induced by gemcitabine in HNSCC cells.**

Apoptosis was analyzed by flow cytometry to quantitate Annexin V-positive cells. P-parental cells; KD1, KD2- two independent knockdown clones.

#### **Figure S2. The Bcl-2 family of proteins in gemcitabine- and Smac-induced apoptosis.**

(A) JHU-012 and 1483 cells treated with 50  $\mu$ M gemcitabine for 48 h. The indicated BH3-only proteins and p53 were analyzed by Western blotting. (B) *Upper*, the indicated

HNSCC lines were infected with PUMA adenovirus (Ad-PUMA) or the BH3 domain deleted PUMA adenovirus (Ad- $\Delta$ BH3) for 48 h. Apoptosis was determined by nuclear fragmentation assay. *Lower*, the indicated parental (P) or SMAC knockdown (KD) HNSCC cells were transfected with Noxa or empty vector (pcDNA3.1) for 48 h. Apoptosis was analyzed by nuclear fragmentation assay. \*\*,  $P < 0.01$ , \*,  $P < 0.05$ , KD vs. P. (C) BH3-only proteins sensitized HNSCC cells to apoptosis induced by gemcitabine. JHU-012 and 1483 cells were treated with 10  $\mu$ M gemcitabine with or without Ad-PUMA or transfected Noxa for 48 h. Apoptosis was determined by nuclear fragmentation assay. \*\*,  $P < 0.01$ , \*,  $P < 0.05$ , combination vs. single agent.

**Figure S3. The Smac mimetic sensitizes HNSCC cells to gemcitabine through apoptosis.** (A) Cytochrome *c* release to the cytosol was analyzed by Western blotting in HNSCC cells with indicated treatment for 48 h. (B) Smac mimetic synergized with gemcitabine to suppress clonogenic survival of HNSCC cells. Cells plated at 6 h following by 10  $\mu$ M gemcitabine or left untreated, and long-term cell growth was assessed by colony formation assay. Representative pictures of colonies are shown. (C) Quantitation of colony numbers. \*\*,  $P < 0.01$ , GT-A+Gem vs. GT-C+Gem.

**Figure S4. The Smac mimetic sensitizes HNSCC cells to cisplatin.** (A) The indicated HNSCC cells were treated with 50  $\mu$ M cisplatin with or without 100 nM control (GT-C) or active (GT-A) Smac mimetic. Apoptosis was determined by nuclear fragmentation assay at 48 h. \*\*,  $P < 0.01$ , GT-A+Cis vs. GT-C+Cis. (B) JHU-022 cells were treated as in (A) and analyzed for apoptosis at indicated time points. \*\*,  $P < 0.01$ , GT-A+Cis vs.

GT-C+Cis. (C) The indicated HNSCC cells were treated with 10  $\mu$ M cisplatin with or without 100 nM GT-A for 6 h, then plated at 1:500 dilution (~400 cells per well) in 12-well plates and allowed to form colonies for 14 days. Number of colonies containing >50 cells were scored and the relative clonogenic survival was calculated with untreated cells set at 100%. \*\*,  $P < 0.01$ , combination vs. single agent.

**Figure S5. The Smac mimetic did not decrease *cIAP-1/2* mRNA levels.** JHU-012 and JHU-022 cells were subjected to GT-A (100 ng/ml) for indicated times. The levels of *cIAP-1/2* mRNA were determined by real-time PCR with values normalized to *GAPDH*.

**Figure S6. The Smac mimetic activated and synergized with TNF- $\alpha$  signaling in cancer cells.** (A) The JHU-012 and JHU-019 cells were preincubated with TNF $\alpha$  antibody (5  $\mu$ g/ml) for 1 h, then treated with TNF $\alpha$  (100 ng/ml) alone or combined with GT-A (100 nM) for 48 h. Apoptosis was analyzed by nuclear fragmentation assay. \*\*,  $P < 0.01$ , \*,  $P < 0.05$ , TNF- $\alpha$ +Ab vs. TNF- $\alpha$  (bar 3 vs. 2); TNF- $\alpha$ +GT-A vs. TNF- $\alpha$  (bar 4 vs. 2); TNF- $\alpha$ +GT-A+Ab vs. TNF- $\alpha$ +GT-A (bar 5 vs. 4). (B) HT-29 colon cancer cells were subjected to GT-A (150 nM) for 48 h. Apoptosis was analyzed by nuclear fragmentation assay. \*\*,  $P < 0.01$ , GT-A vs. Un (bar 3 vs. 1); GT-A vs. GT-A+Ab (bar 3 vs. 4).

**Figure S7. Smac modulates the therapeutic responses to gemcitabine in HNSCC xenografts.** (A) Growth curve of JHU-012 parental (P) and SMAC knockdown (KD) tumors (n = 7 per group) subjected to indicated treatments. Three treatments of

gemcitabine on day 10, 13 and 16 are indicated by arrows. \*\*,  $P < 0.01$ . KD1+Gem vs. P+Gem, \*,  $P < 0.05$ . KD1 + Gem vs. KD1 + ddH<sub>2</sub>O. **(B)** Index of TUNEL-positive or BrdU-labeled cells in JHU-012 tumors 24 h after the second gemcitabine injection. \*\*,  $P < 0.001$ , KD1 + Gem vs. P + Gem.

Sun et al. Figure S1

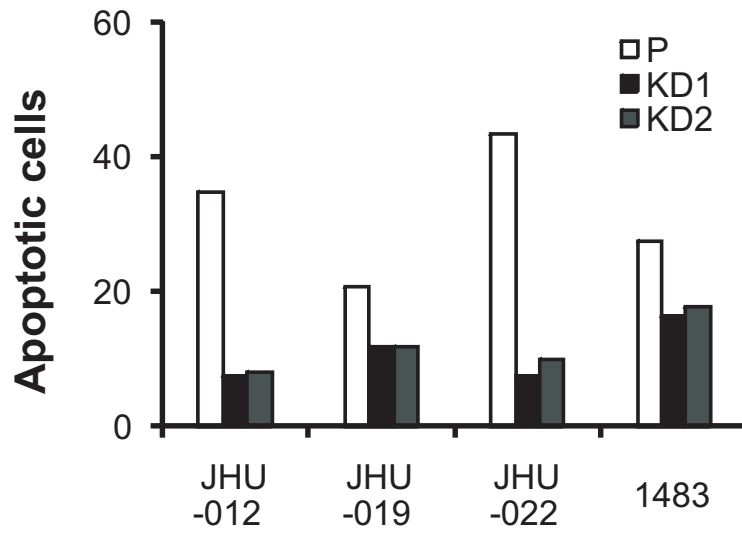

Sun et al. Figure S2

**A**

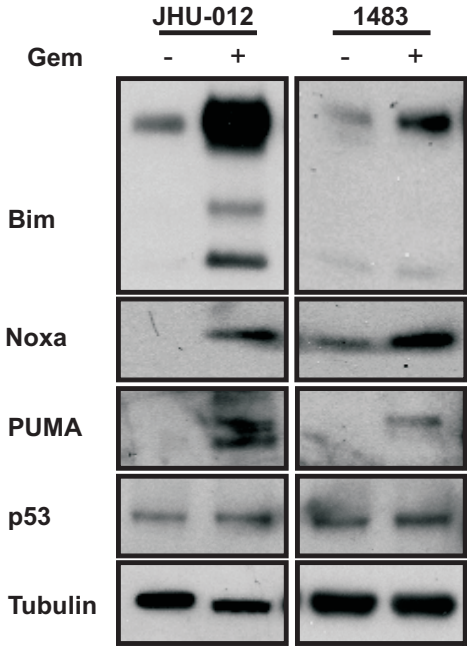

**B**

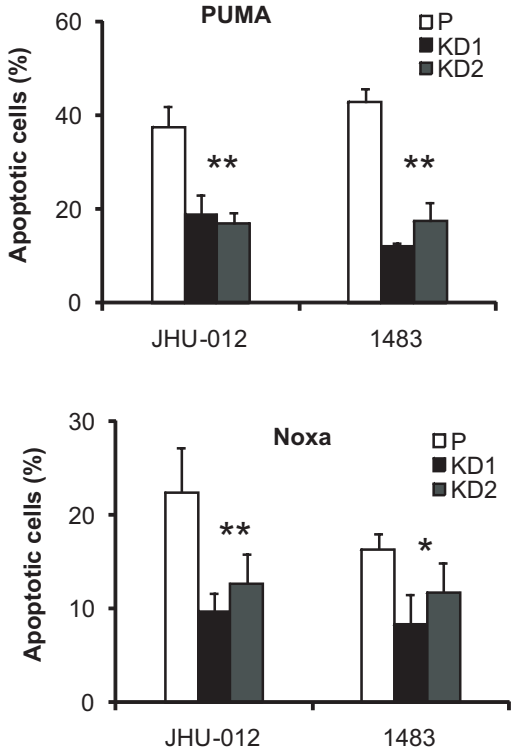

**C**

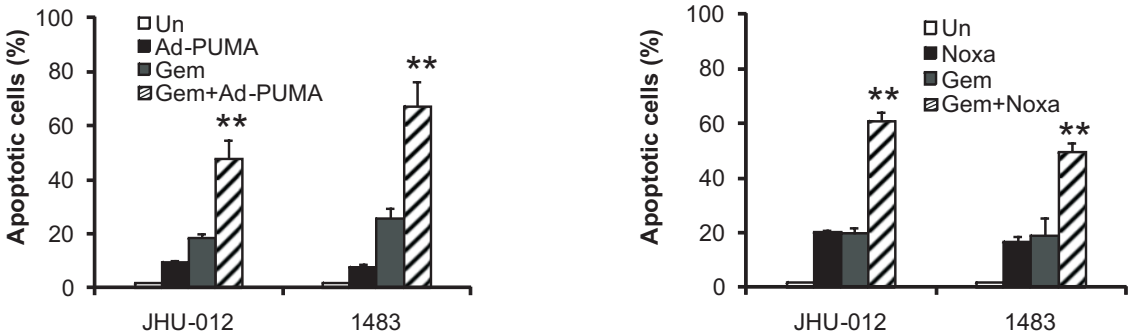

# Sun et al. Figure S3

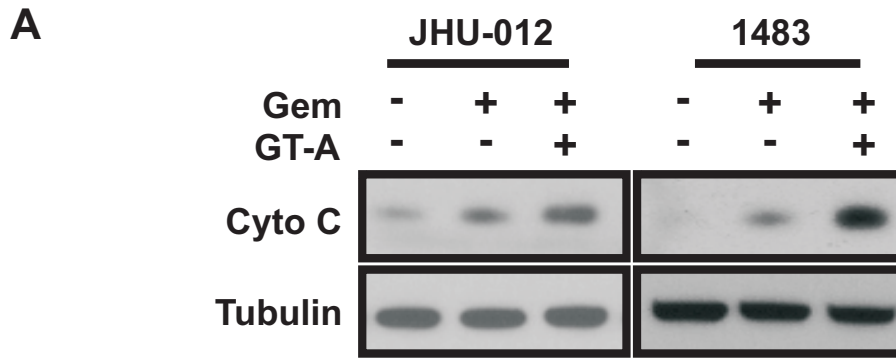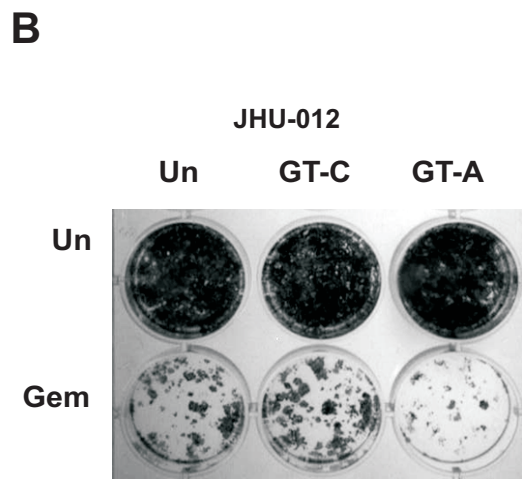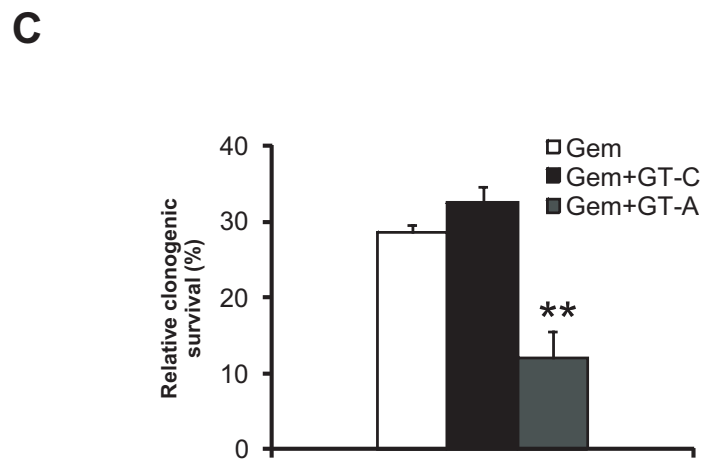



# Sun et al. Figure S4

**A**

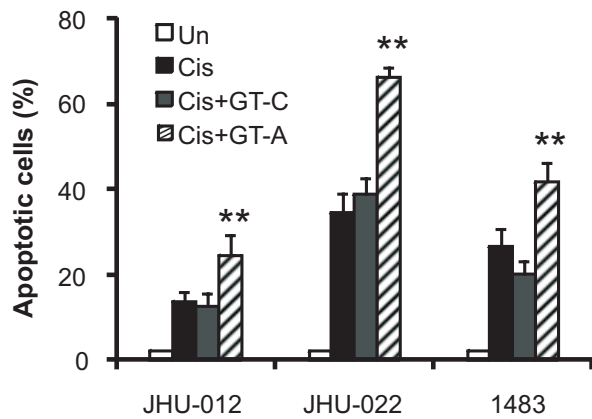

**B**

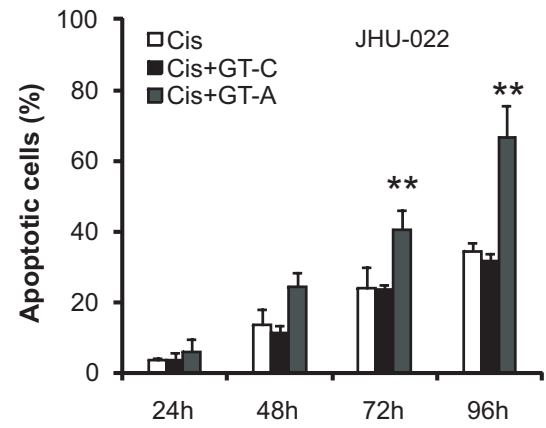

**C**

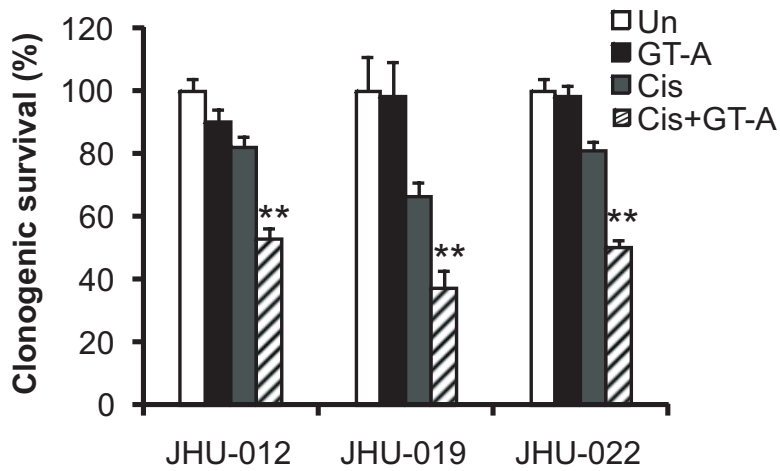

Sun et al. Figure S5

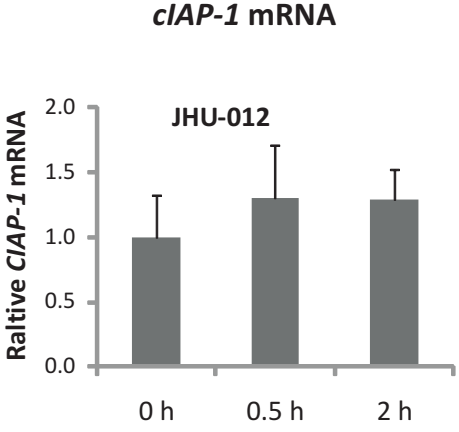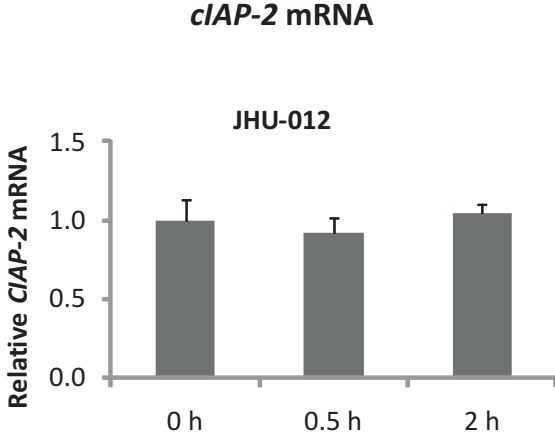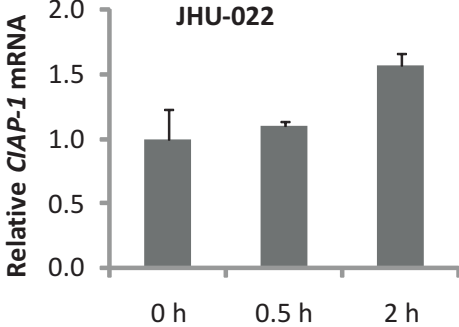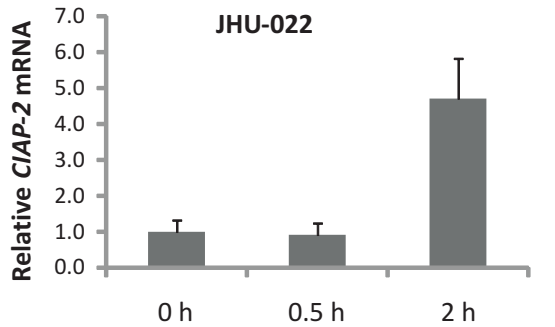

**A**

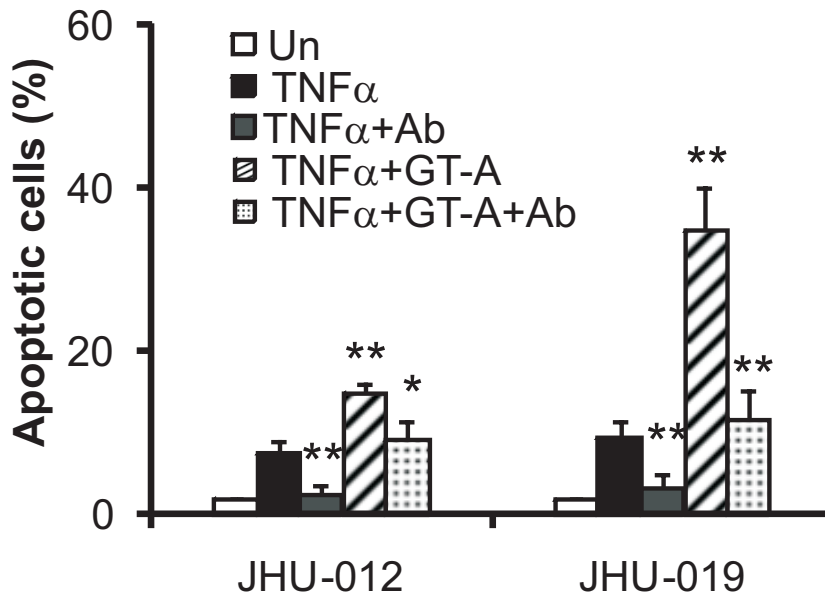

**B**

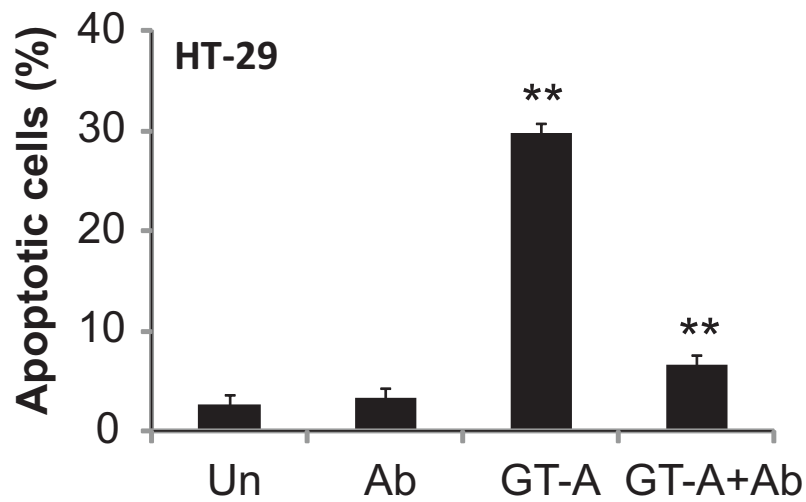

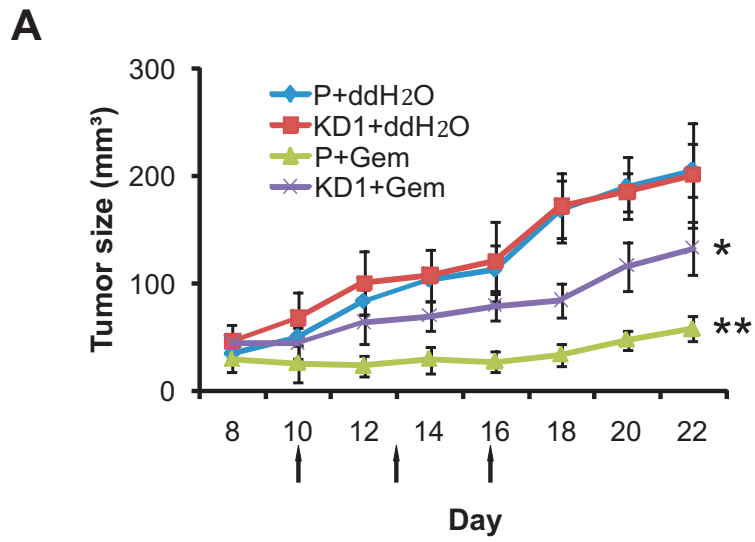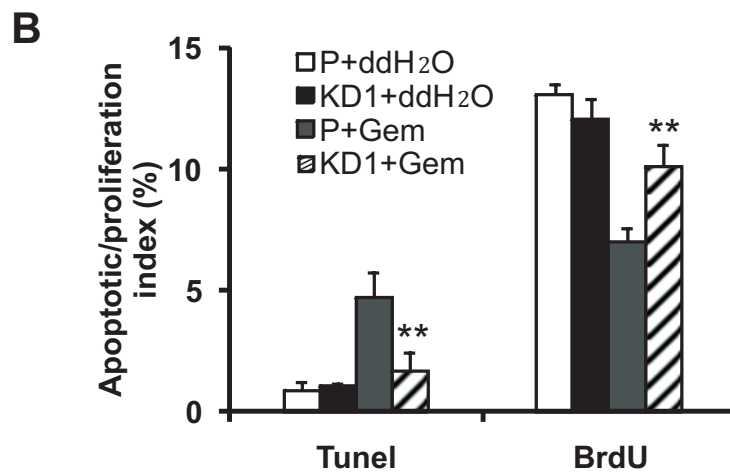

Supplement: NIHMS264537-supplement-1.pdf [file NIHMS264537-supplement-1.pdf]
